# Supplementary material for: Hierarchical hybrid crosslinking multifunctional gelatin-based hydrogel: ideal platforms for flexible wearable devices, brain–computer interfaces and biomedical applications
Source: Royal Society of Chemistry journal article supplement (doi:10.1039/d4ta04767b), 2024-11-26
Supplement: d4ta04767b1.pdf [file d4ta04767b1.pdf]

## Supporting information

### **Hierarchical hybrid crosslinking multifunctional gelatin-based hydrogel: ideal platforms for flexible wearable devices, brain-computer interfaces and biomedical applications**

Chang Xu<sup>a, c</sup>, Shiqiang Guan<sup>b</sup>, Hao Zhang<sup>d</sup>, Weiwang Fan<sup>a</sup>, Xijing Zhuang<sup>a\*</sup>, Xufeng Dong<sup>a, b\*</sup>

<sup>a</sup> Department of Cardiovascular Surgery, Central Hospital of Dalian University of Technology, Dalian, 116089, P. R. China

<sup>b</sup> School of Materials Science and Engineering, Dalian University of Technology, Dalian, 116024, P. R. China

<sup>c</sup> Faculty of Medicine, Dalian University of Technology, Dalian, 116024, P. R. China

<sup>d</sup> Department of Orthopaedics, Central Hospital of Dalian University of Technology, Dalian, 116089, P. R. China

\*Corresponding author.

E-mail addresses: dlmchcsd@126.com (X. Zhuang), dongxf@dlut.edu.cn (X. Dong).

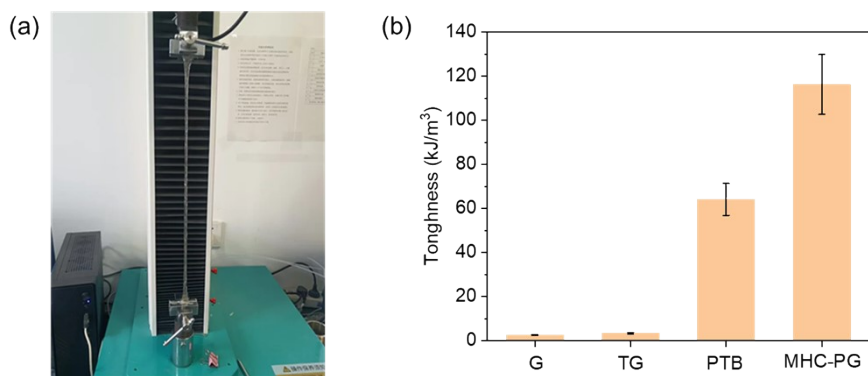

**Fig. S1** (a) Digital photograph of MHC-PG hydrogel under extreme stretching. (b) Toughness of G, TG, PTB and MHC-PG hydrogels.

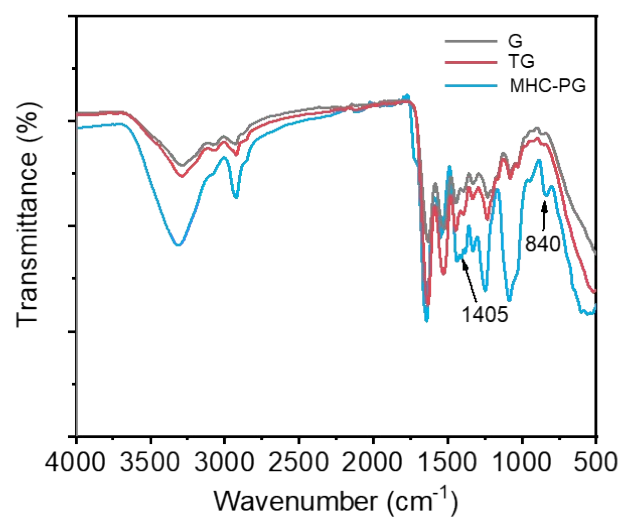

**Fig. S2** FT-IR profiles of G, TG, and MHC-PG hydrogels.

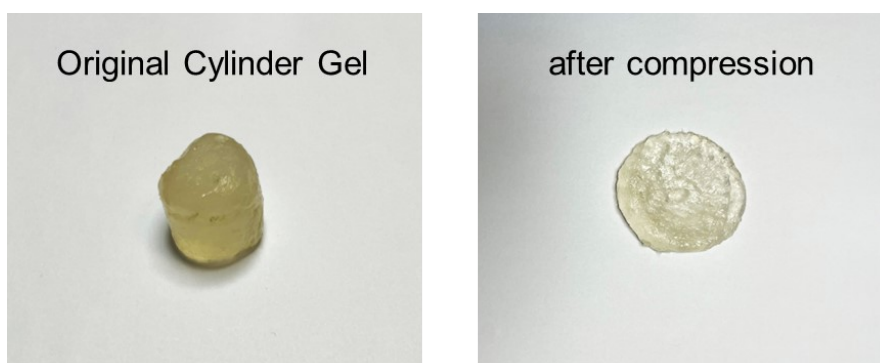

**Fig. S3** Digital photographs of MHC-PG hydrogels subjected to 90% compression deformation.

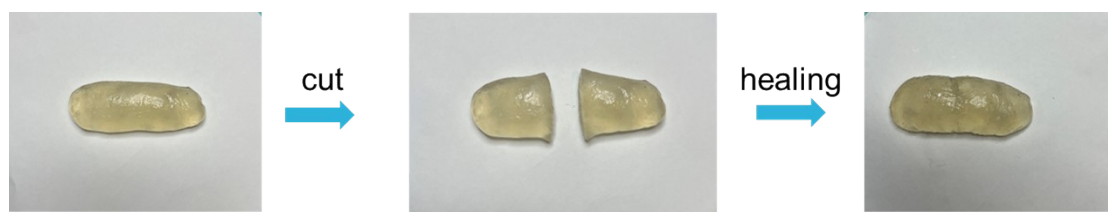

**Fig. S4** Digital photographs of the healing process of MHC-PG hydrogel

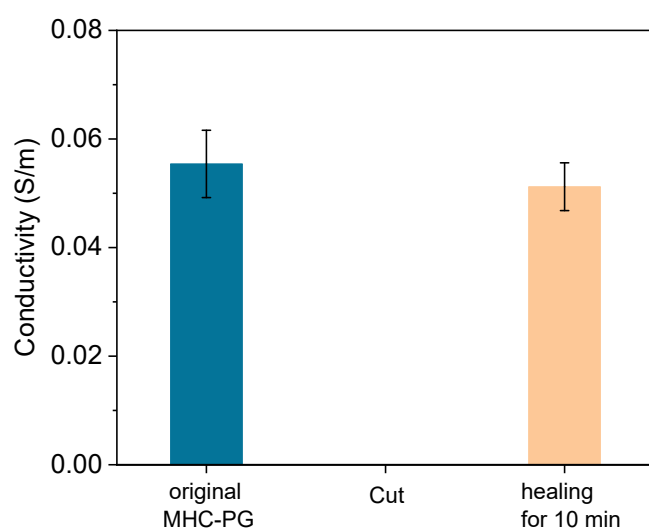

**Fig. S5** Conductivity of hydrogel MHC-PG hydrogels before and after self-healing.

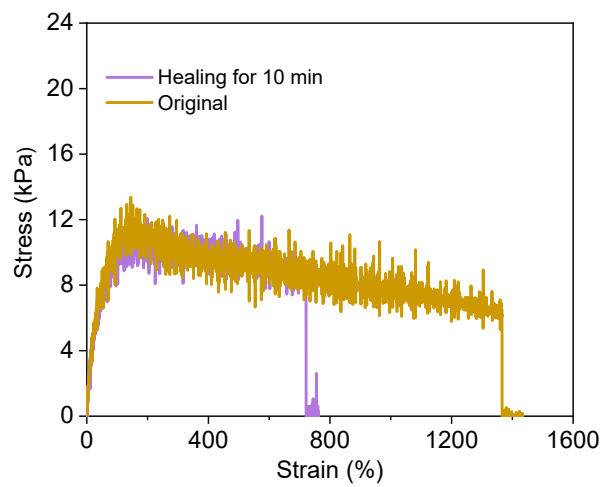

**Fig. S6** Stress-strain curves of MHC-PG hydrogels before and after self-healing.

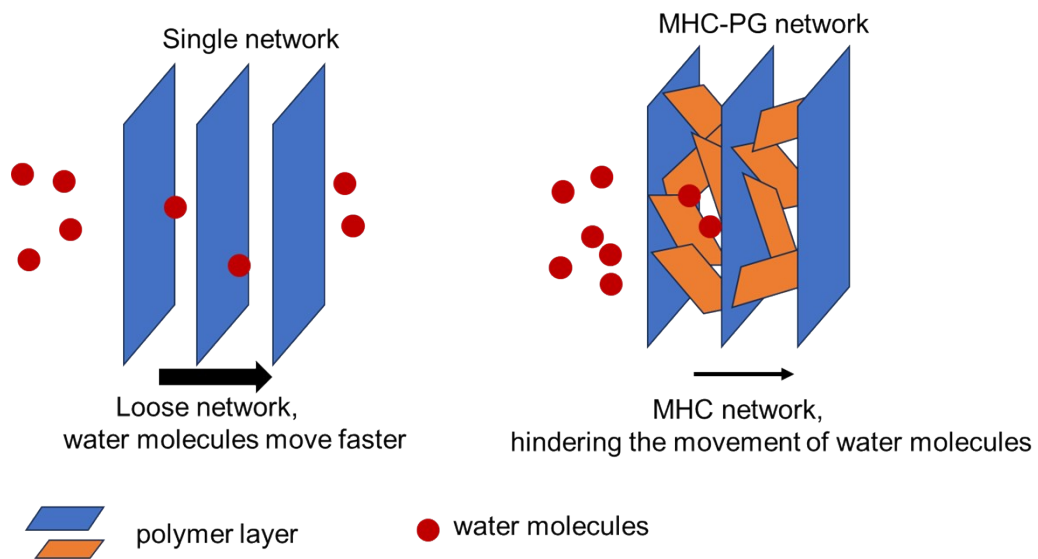

**Fig. S7** Schematic of water molecule diffusion in hydrogels with different network structures.



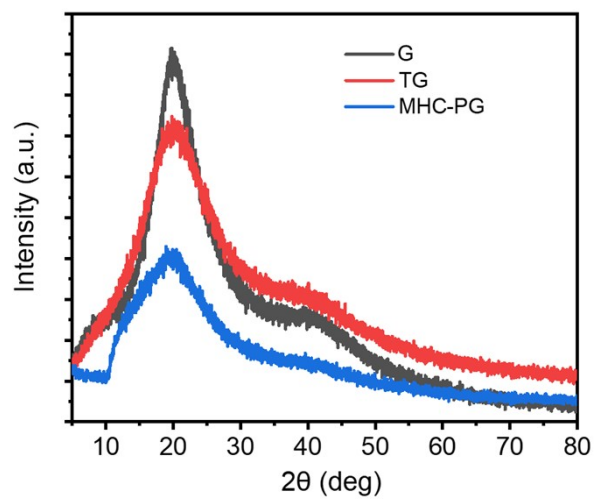

**Fig. S8** XRD profiles of G, TG, and MHC-PG hydrogels.

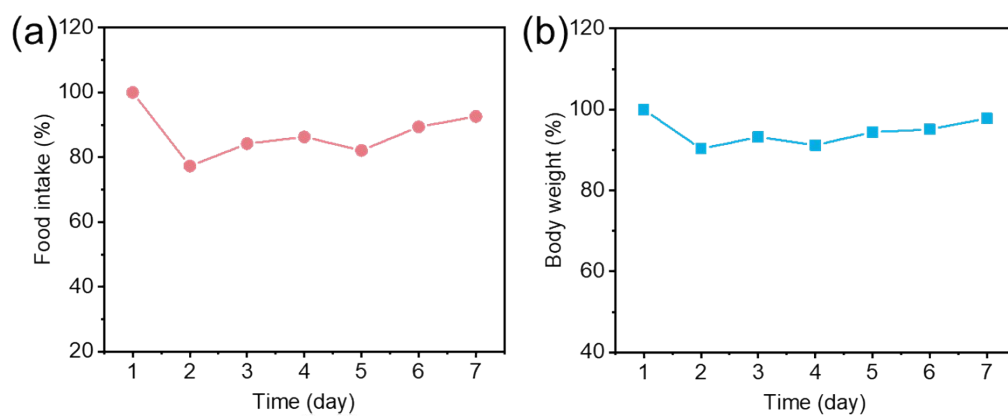

**Fig. S9** (a) Changes in food intake of mice after MHC-PG hydrogel implantation. (b) Changes in body weight of mice after MHC-PG hydrogel implantation.

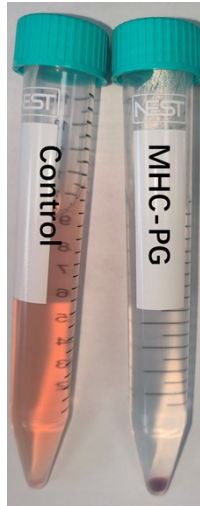

**Fig. S10** Blood compatibility of MHC-PG hydrogel.

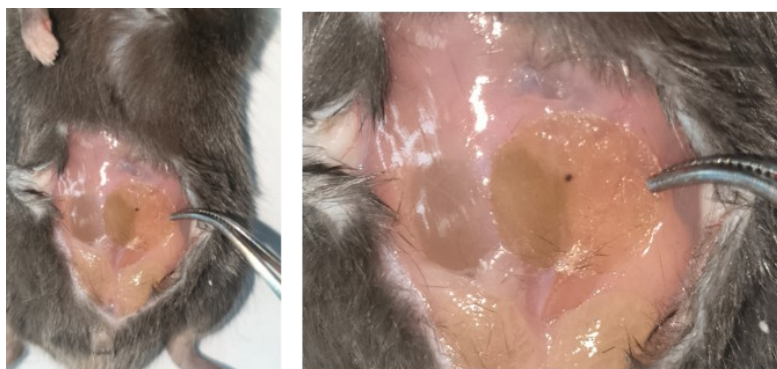

**Fig. S11** Adhesion behavior of MHC-PG hydrogel to skin tissue.

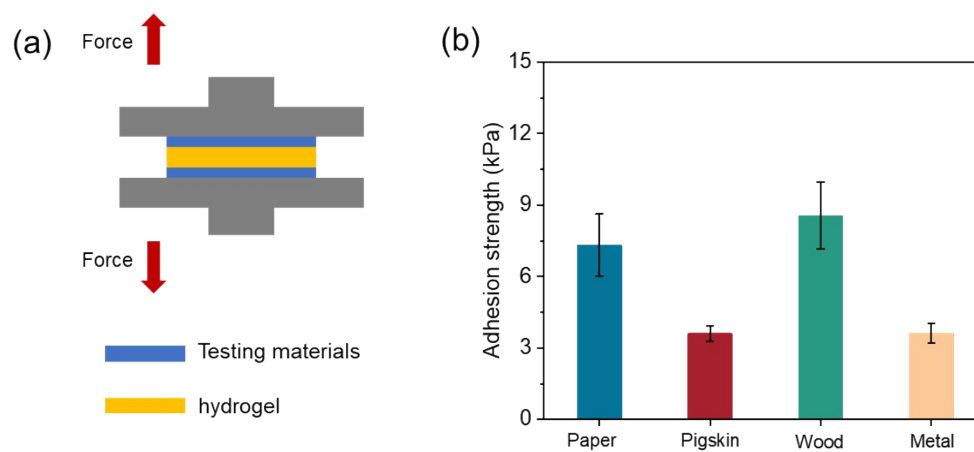

**Fig. S12** (a) Schematic diagram of adhesion test, (b) Adhesion of MHC-PG hydrogel to different materials.

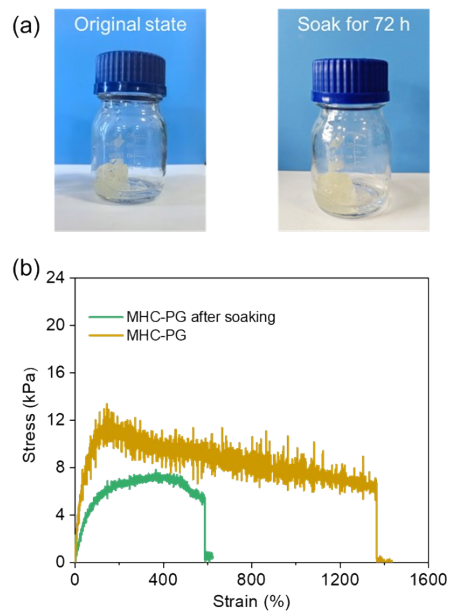

**Fig. S13** (a) Digital photographs of hydrogels after soaking in simulated body fluids for 72 h. (b) Stress-strain curves of MHC-PG hydrogels after soaking in simulated body fluids for 72 h.

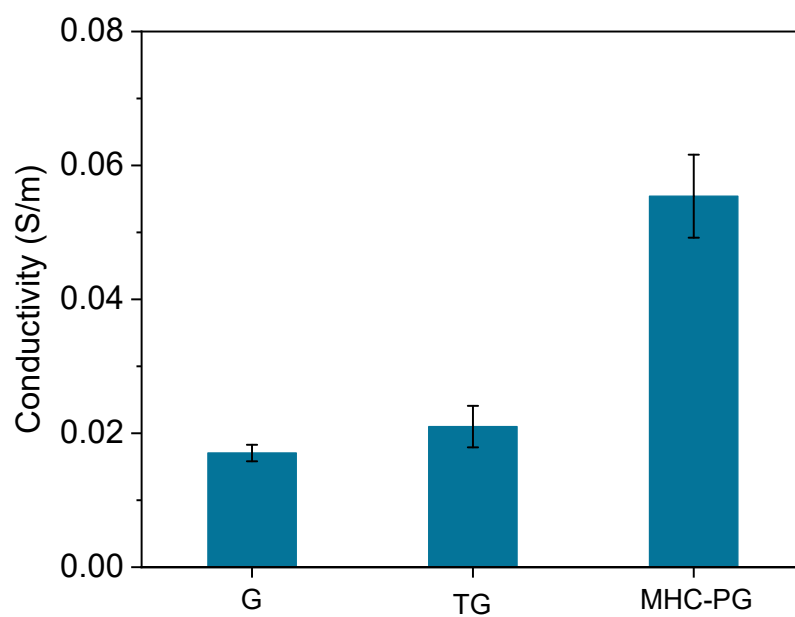

**Fig. S14** Conductivity of G, TG, and MHC-PG hydrogels.

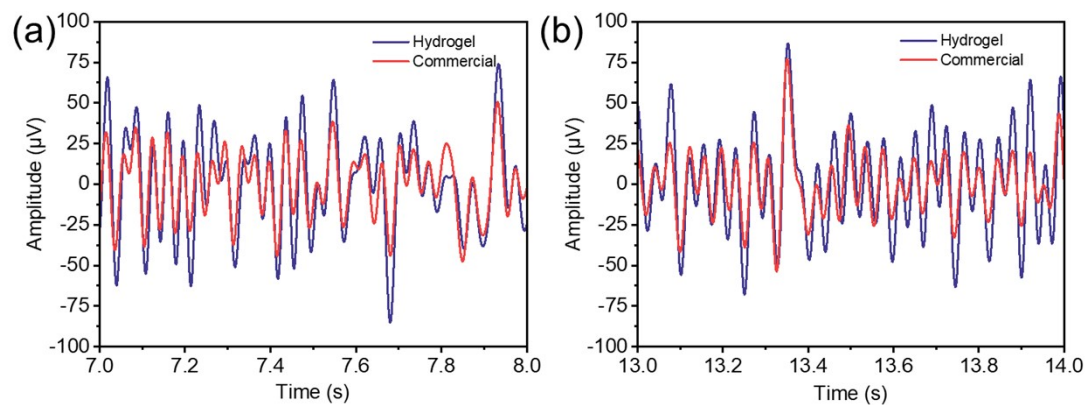

**Fig. S15** (a) Randomly selected segments of 7~8s EEG signal recordings. (b) randomly selected segments of 13~14s EEG signal recordings.
